# Supplementary material for: Thermal and photoinduced electron transfer reactions of phthalocyanine complexes of Zn(ii) and Cu(ii) in acetonitrile
Source: Royal Society of Chemistry journal article supplement (doi:10.1039/d2dt02498e), 2022-01-01
Supplement: d2dt02498e1.pdf [file d2dt02498e1.pdf]

## Supplementary Information

### Thermal and Photoinduced Electron Transfer Reaction of Phthalocyanine Complexes of Zn(II) and Cu(II) in Acetonitrile

Yui Okawa,<sup>a</sup> Kousuke Endo,<sup>a</sup> Yukihiro Hakamata,<sup>a</sup> Shingo Watanabe,<sup>a</sup> Aika Yokoyama,<sup>a</sup>  
Tamotsu Sugimori,<sup>b</sup> Hideo D. Takagi,<sup>c</sup> and Masahiko Inamo<sup>a\*</sup>

<sup>a</sup> *Department of Chemistry, Aichi University of Education, Kariya 448-8542, Japan*

<sup>b</sup> *Institute of Liberal arts and Sciences, University of Toyama, Toyama 930-8555, Japan*

<sup>c</sup> *Research Centre for Materials Science, Nagoya University, Nagoya 464-8602, Japan*

## Contents

- Figure S1. UV-visible absorption spectrum of the free base phthalocyanine in acetonitrile.
- Figure S2.  $^1\text{H}$  NMR spectra of the phthalocyanine and its Zn(II) complex in  $\text{CDCl}_3$ .
- Figure S3. UV-visible absorption spectra of  $[\text{Zn}(\text{Pc})]$  in acetonitrile.
- Figure S4. UV-visible absorption spectra of  $[\text{Cu}(\text{Pc})]$  in acetonitrile.
- Figure S5. The spectral change in the UV-visible region for the reaction of the Zn(II) phthalocyanine complex with  $\text{Cu}^{2+}$  in acetonitrile.
- Figure S6. The spectral change in the UV-visible region for the reaction of the Cu(II) phthalocyanine complex with  $\text{Cu}^{2+}$  in acetonitrile.
- Figure S7. The UV-visible absorption spectra of the  $\pi$ -cation radical of the Zn(II) phthalocyanine complex.
- Figure S8. The spectral change in the UV-visible region for the electrochemical oxidation of the Zn(II) phthalocyanine complex in acetonitrile.
- Figure S9. Transient absorption spectrum observed for the solution of  $[\text{Zn}(\text{Pc})]$ .
- Figure S10. Comparison of the transient absorption spectrum observed for the solution of  $[\text{Zn}(\text{Pc})]$  in the presence of  $[\text{VO}(\text{salen})]^+$  and the difference spectrum between the  $\pi$ -cation radical  $[\text{Zn}(\text{Pc})]^+$  and  $[\text{Zn}(\text{Pc})]$ .
- Figure S11. Absorbance-time traces for the photoinduced electron transfer reaction (A) and the back electron transfer reaction (B).
- Figure S12. The molecular structure of the phthalocyanine complexes mentioned in the article.

Preparation of compounds.

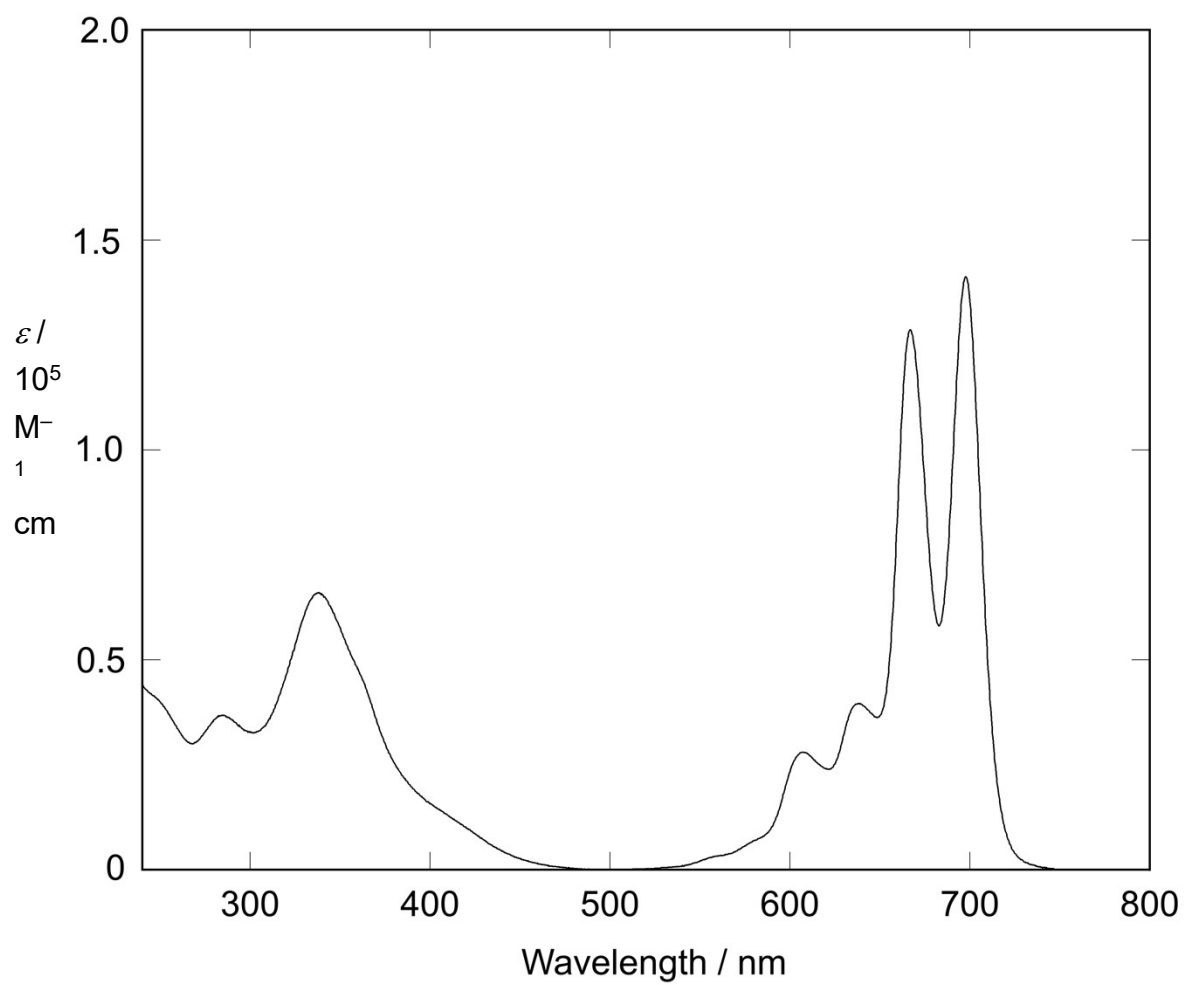

**Figure S1.** UV-visible absorption spectrum of the free base phthalocyanine in acetonitrile.

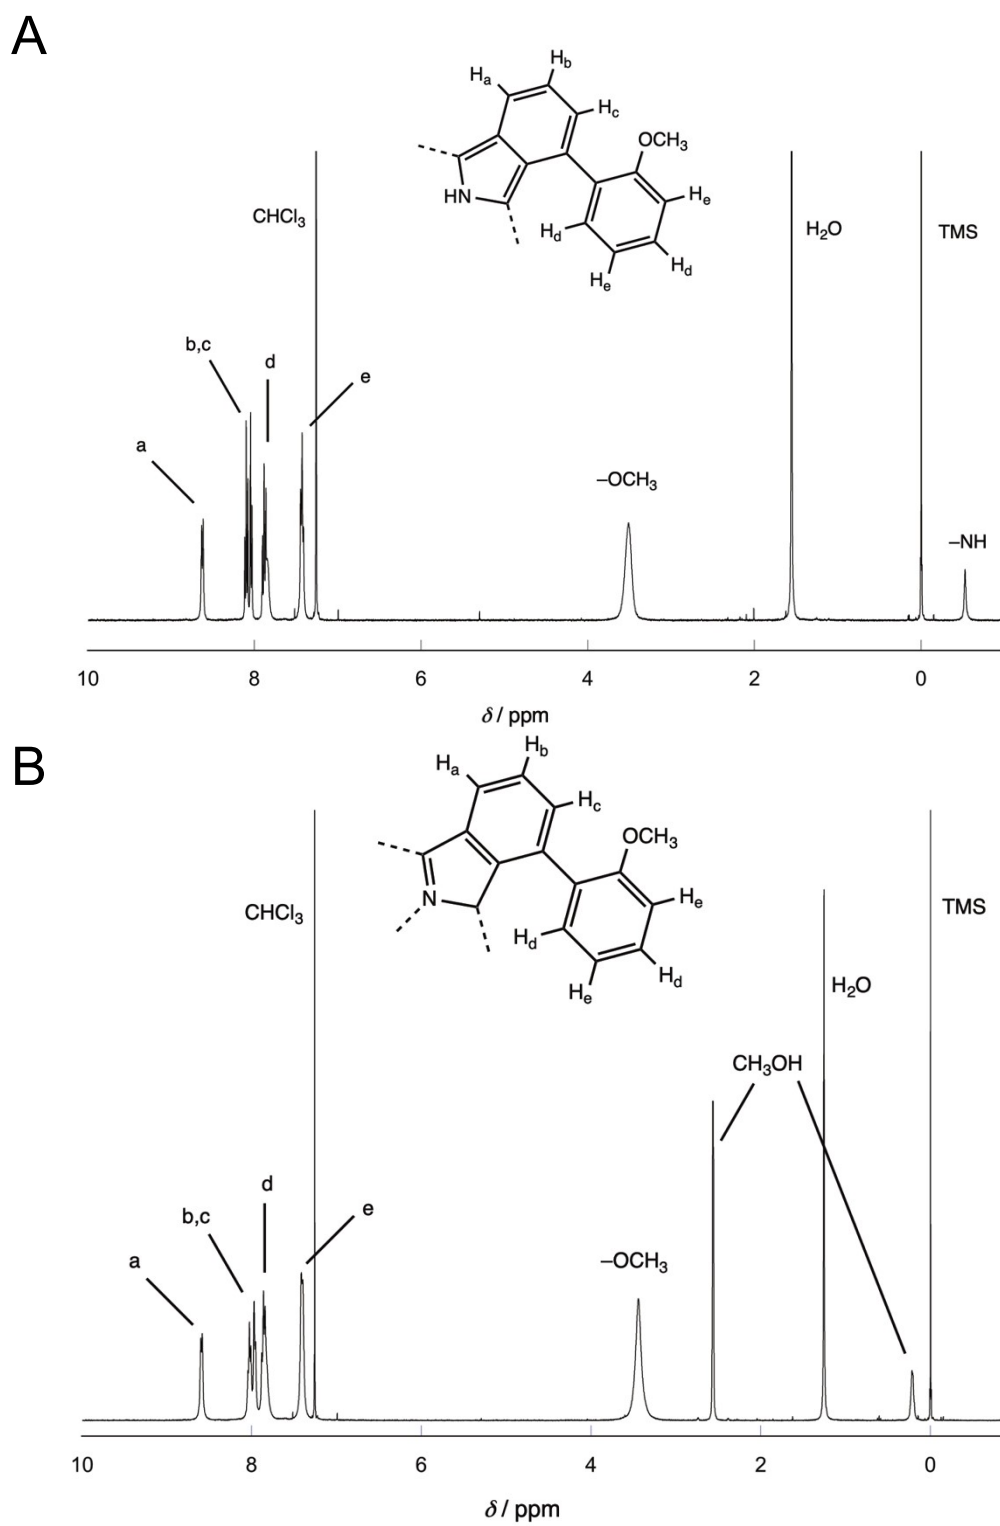

**Figure S2.**  $^1\text{H}$  NMR spectra of the phthalocyanine (A) and its Zn(II) complex (B) in  $\text{CDCl}_3$ .

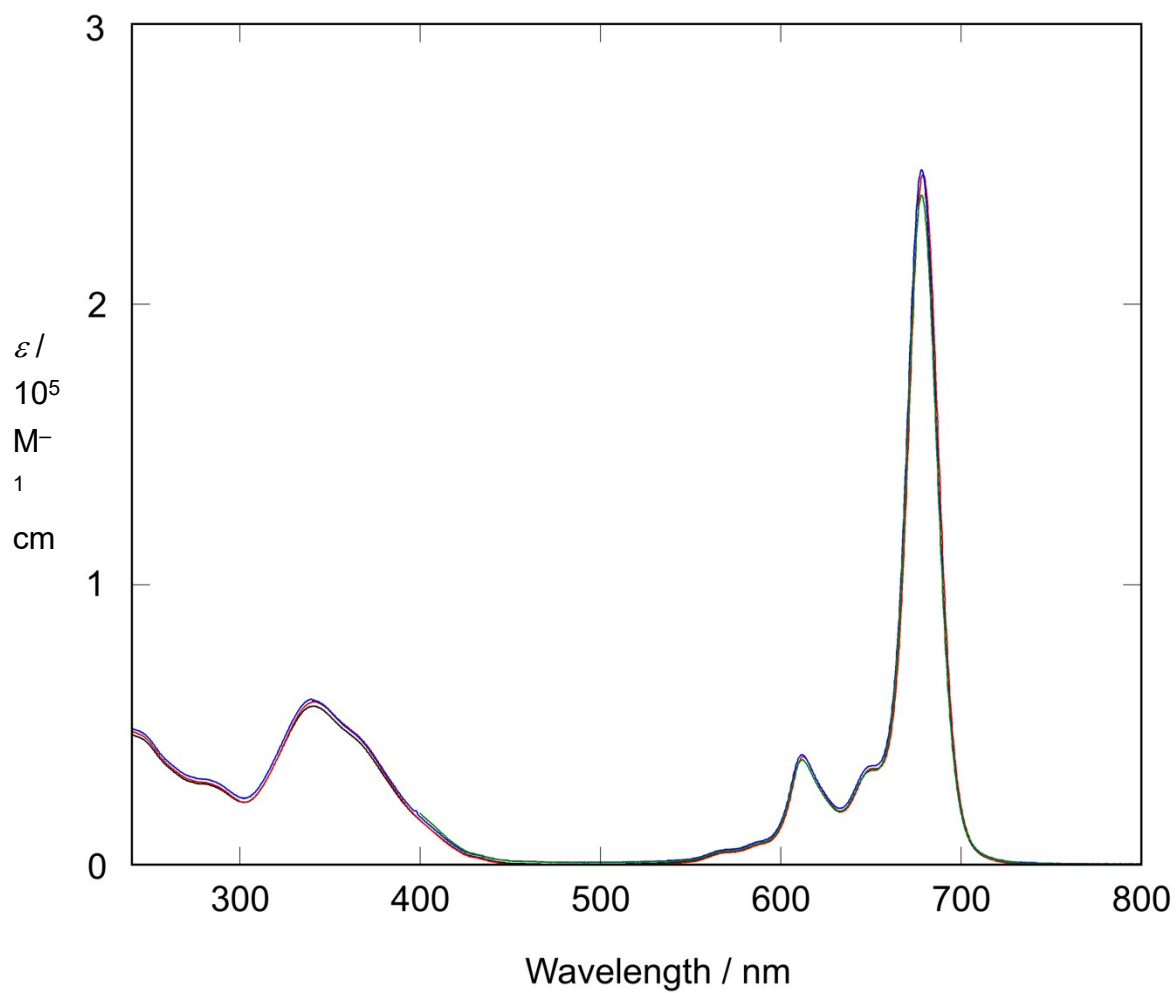

**Figure S3.** UV-visible absorption spectra of [Zn(Pc)] in acetonitrile. Concentration of [Zn(Pc)] is  $1.50 \times 10^{-6}$  M (green line),  $8.33 \times 10^{-6}$  M (blue line),  $8.33 \times 10^{-5}$  M (red line), and  $1.43 \times 10^{-4}$  M (black line).

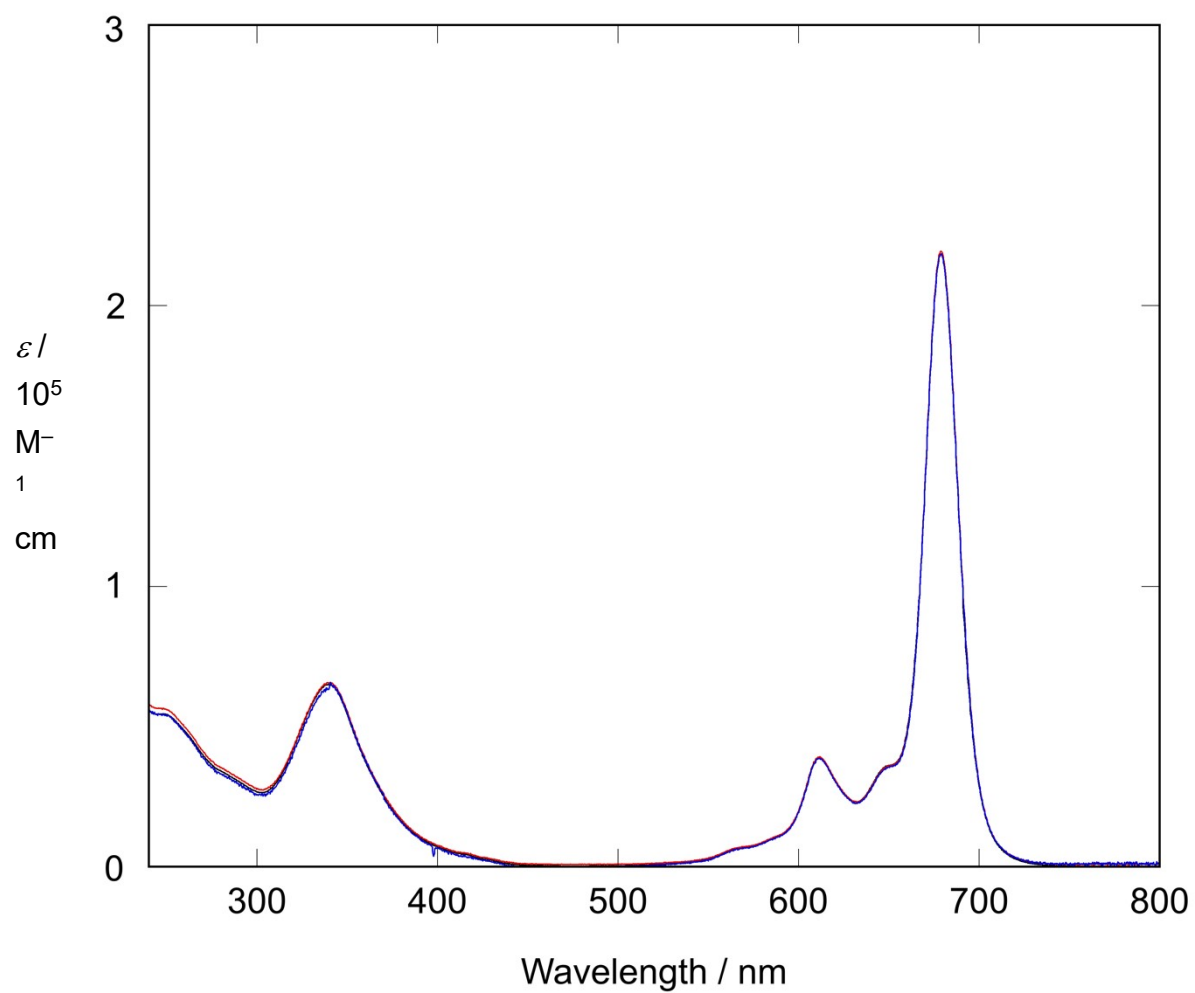

**Figure S4.** UV-visible absorption spectra of [Cu(Pc)] in acetonitrile. Concentration of [Cu(Pc)] is  $6.00 \times 10^{-7}$  M (blue line),  $1.78 \times 10^{-6}$  M (red line), and  $2.06 \times 10^{-5}$  M (black line).

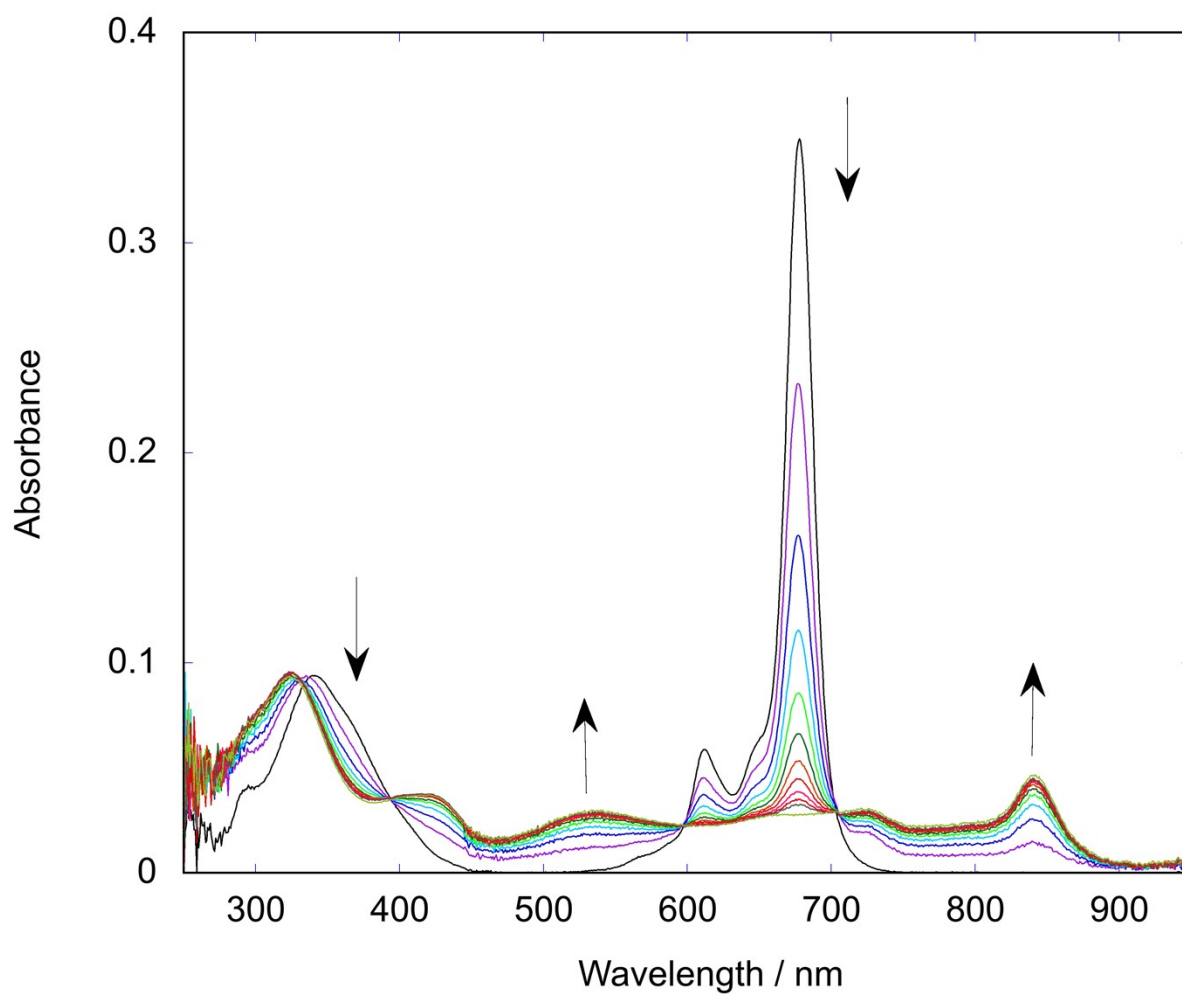

**Figure S5.** The spectral change in the UV-visible region for the reaction of the Zn(II) phthalocyanine complex with Cu<sup>2+</sup> in acetonitrile.  $C_{[\text{Zn}(\text{Pc})]} = 3.30 \times 10^{-6}$  M,  $[\text{Cu}^{2+}] = 1.94 \times 10^{-4}$  M. Spectra were measured at every 8 ms interval.

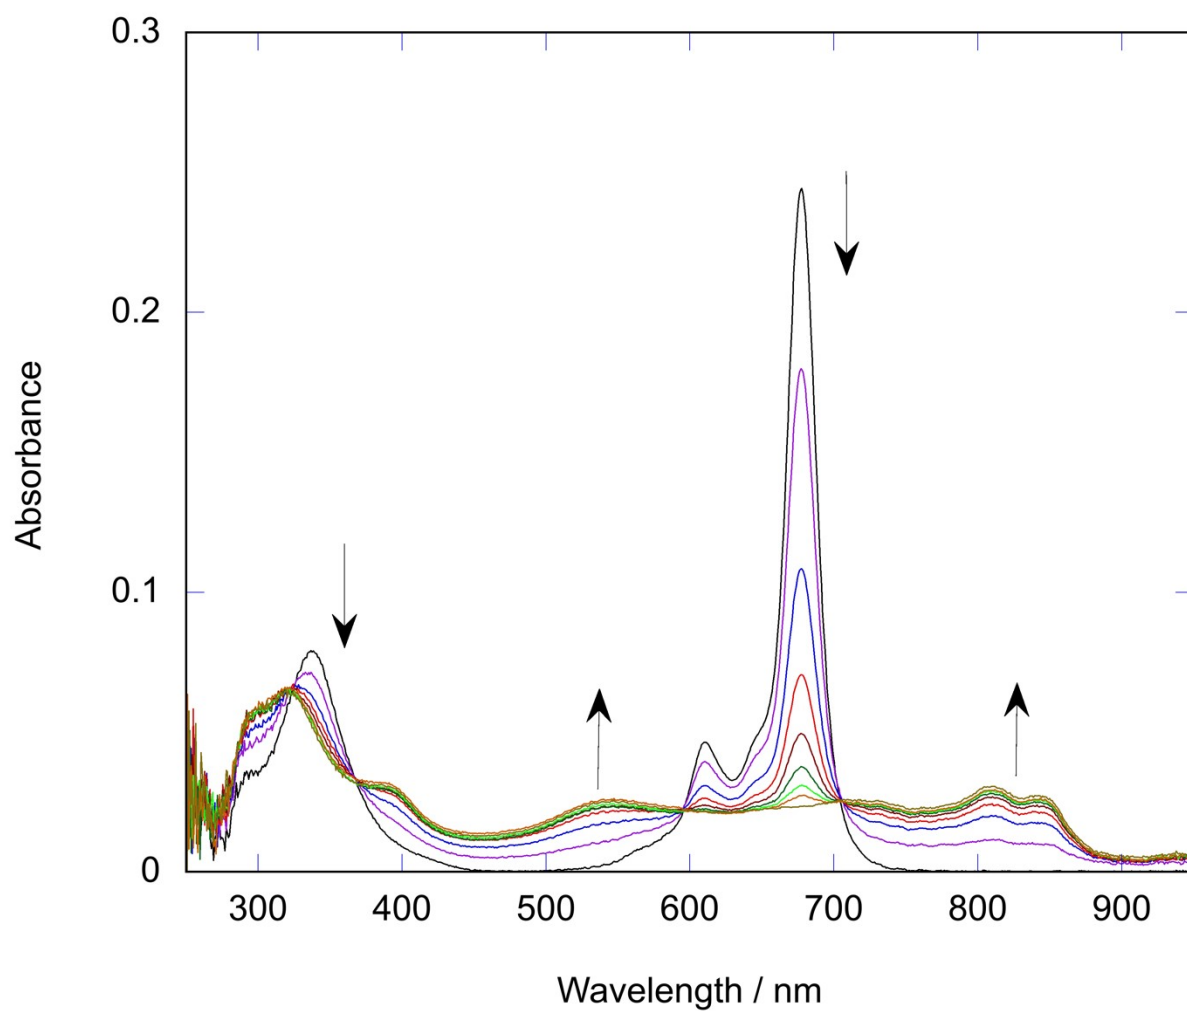

**Figure S6.** The spectral change in the UV-visible region for the reaction of the Cu(II) phthalocyanine complex with Cu<sup>2+</sup> in acetonitrile.  $C_{[\text{Cu}(\text{Pc})]} = 1.21 \times 10^{-6}$  M,  $[\text{Cu}^{2+}] = 1.69 \times 10^{-4}$  M. Spectra were measured at every 20 ms interval.



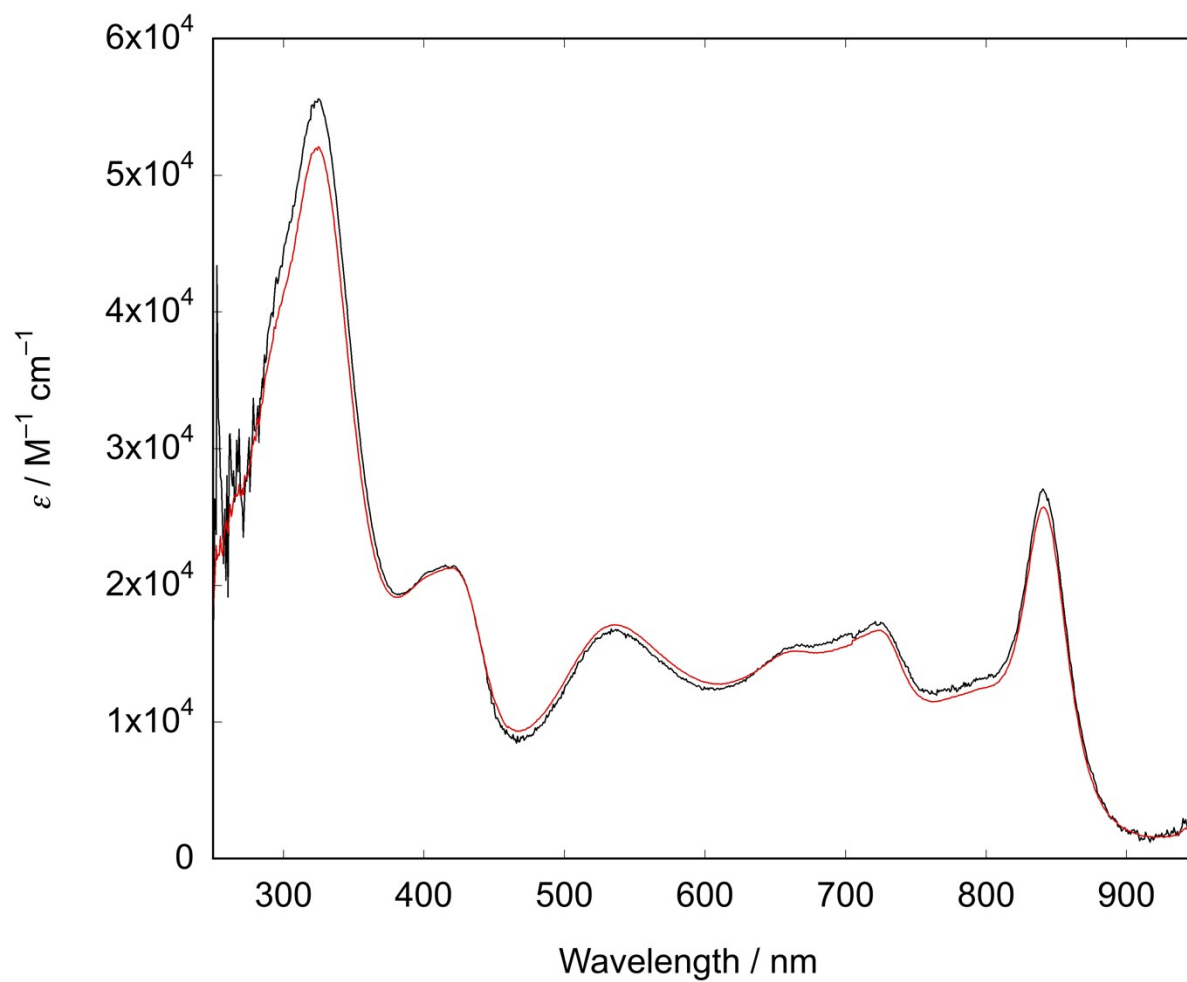

**Figure S7.** The UV-visible absorption spectra of the  $\pi$ -cation radical of the Zn(II) phthalocyanine complex given by the reaction with  $\text{Cu}^{2+}$  in acetonitrile.  $C_{[\text{Zn(Pc)}]} = 1.65 \times 10^{-6}$  M (black line),  $1.65 \times 10^{-5}$  M (red line).

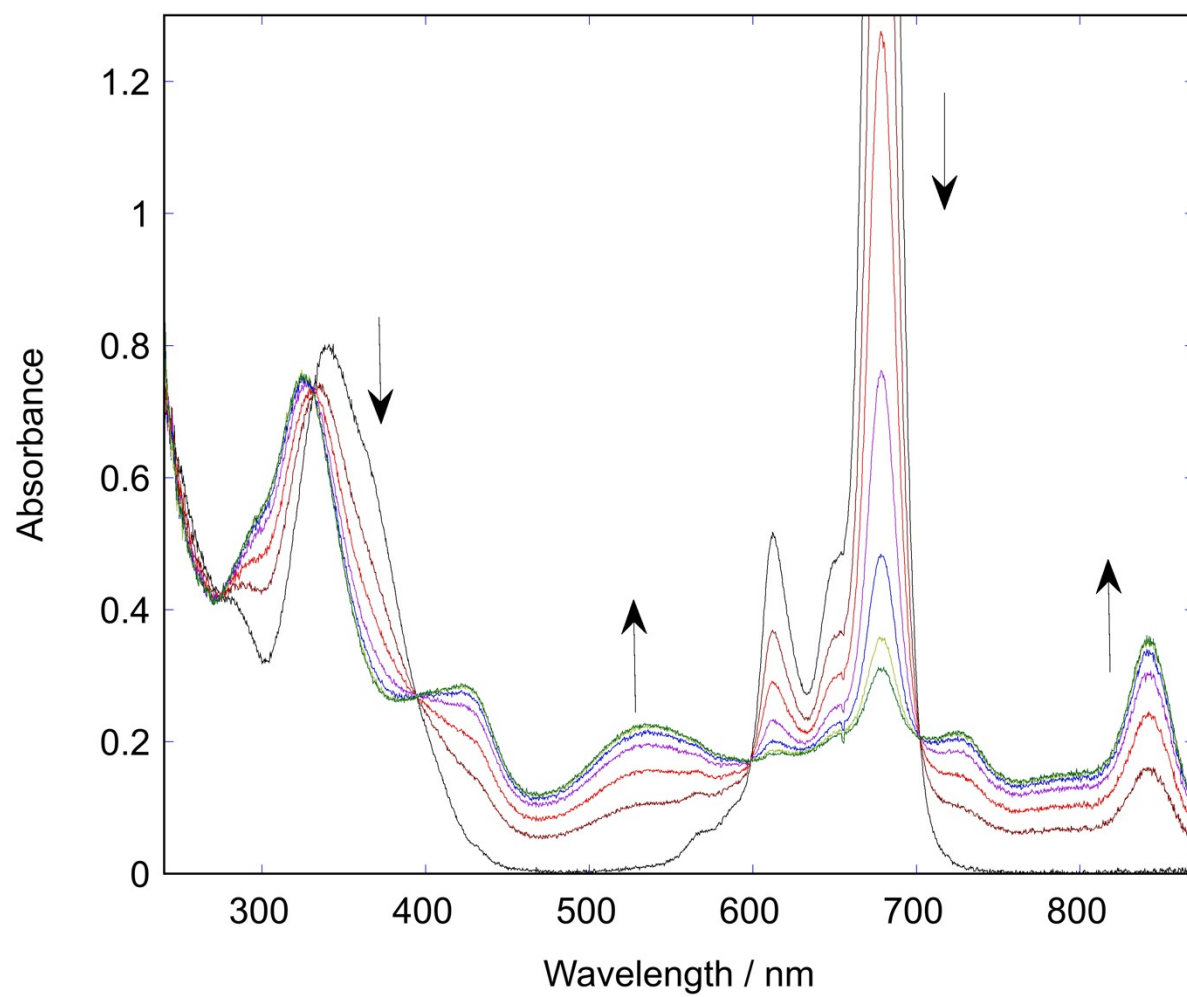

**Figure S8.** The spectral change in the UV-visible region for the electrochemical oxidation of the Zn(II) phthalocyanine complex in acetonitrile. The applied voltage was 0.38 V vs.  $\text{Fc}^{+/0}$ .  $[\text{TBAP}] = 0.10 \text{ M}$ .

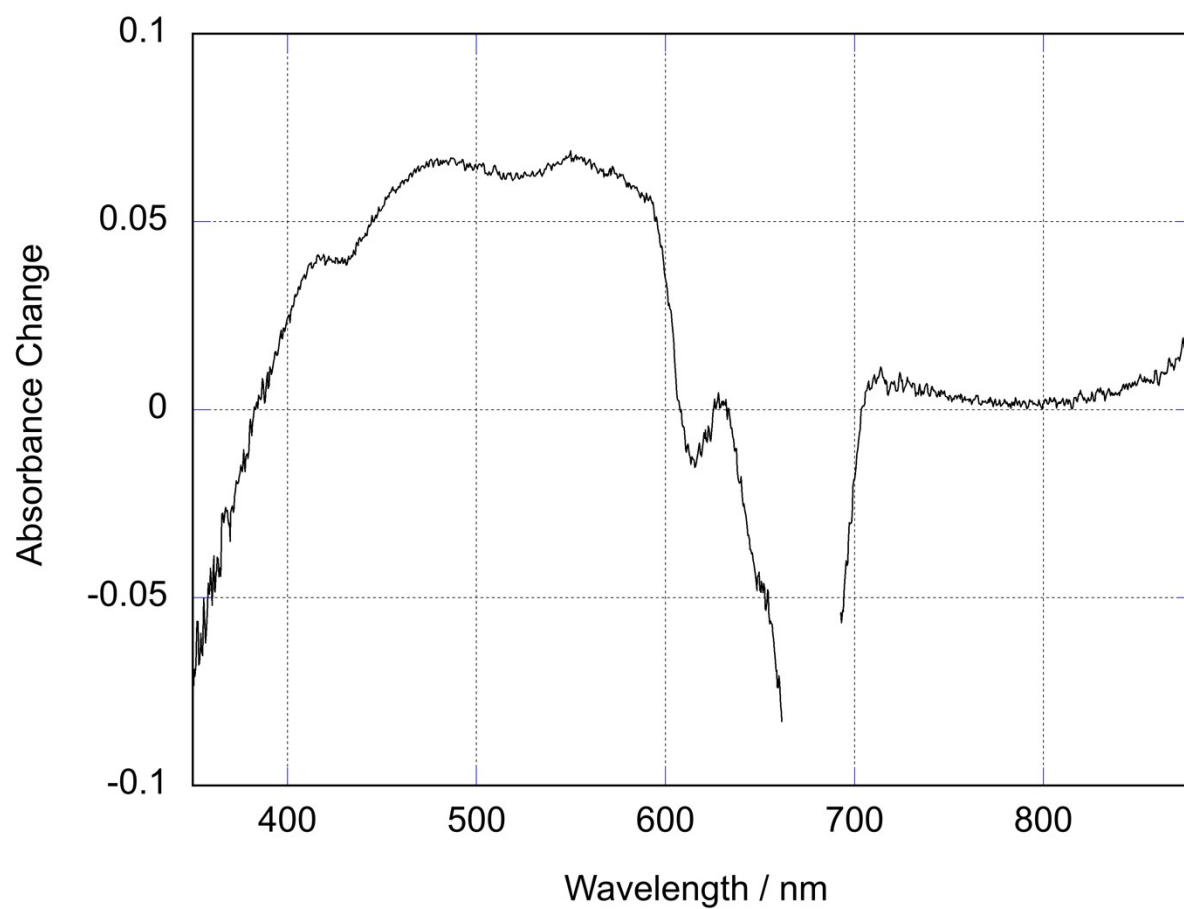

**Figure S9.** Transient absorption spectrum observed for the solution of [Zn(Pc)]. [Zn(Pc)] =  $2.67 \times 10^{-5}$  M. The spectra were recorded 1  $\mu$ s after a laser pulse under argon atmosphere.

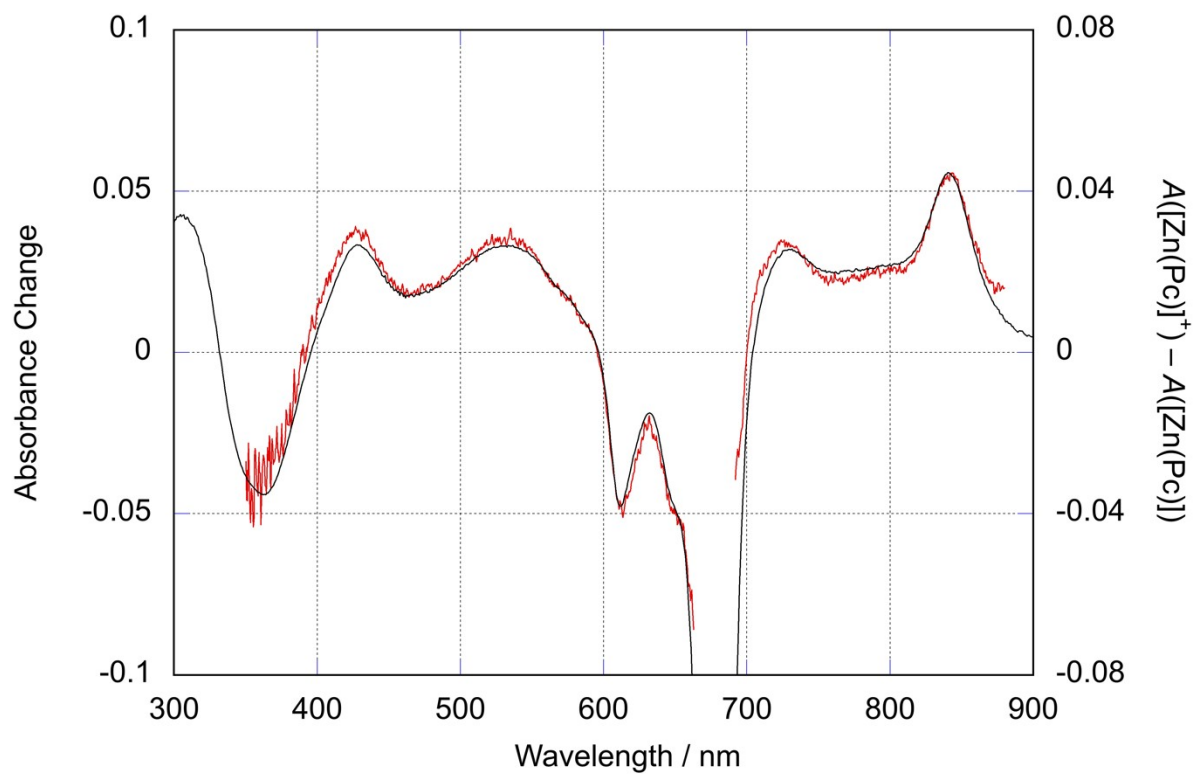

**Figure S10.** Comparison of the transient absorption spectrum observed for the solution of [Zn(Pc)] in the presence of [VO(salen)]<sup>+</sup> recorded 15 μs after a laser pulse (red line) and the difference spectrum between the π-cation radical [Zn(Pc)]<sup>+</sup> and [Zn(Pc)] (black line).

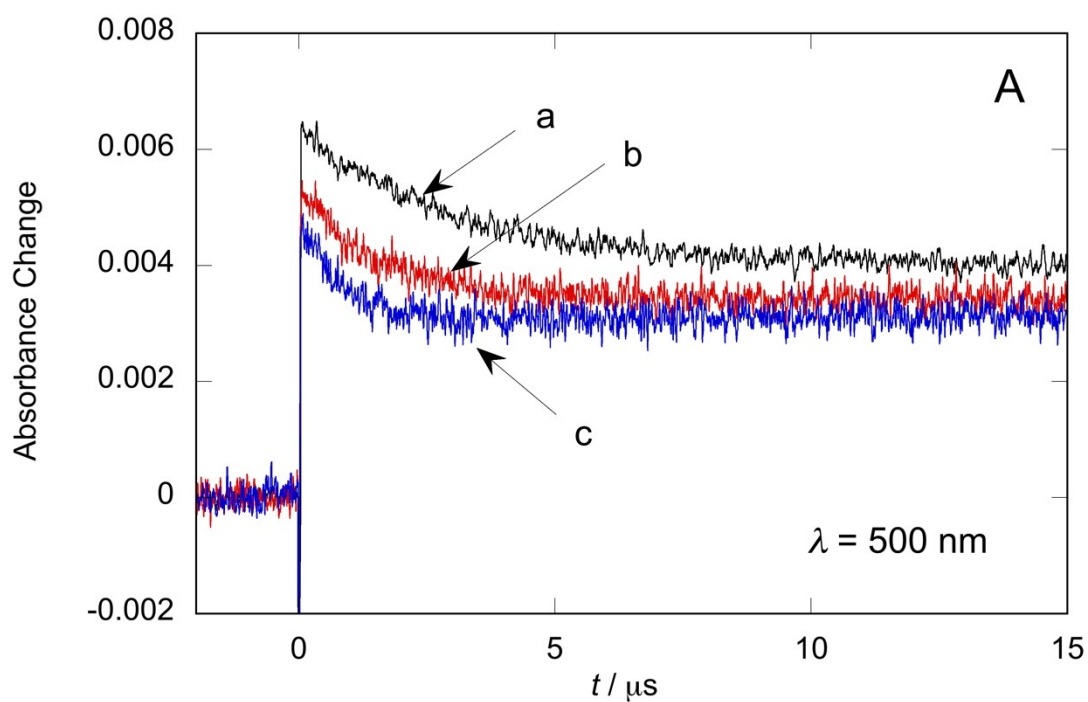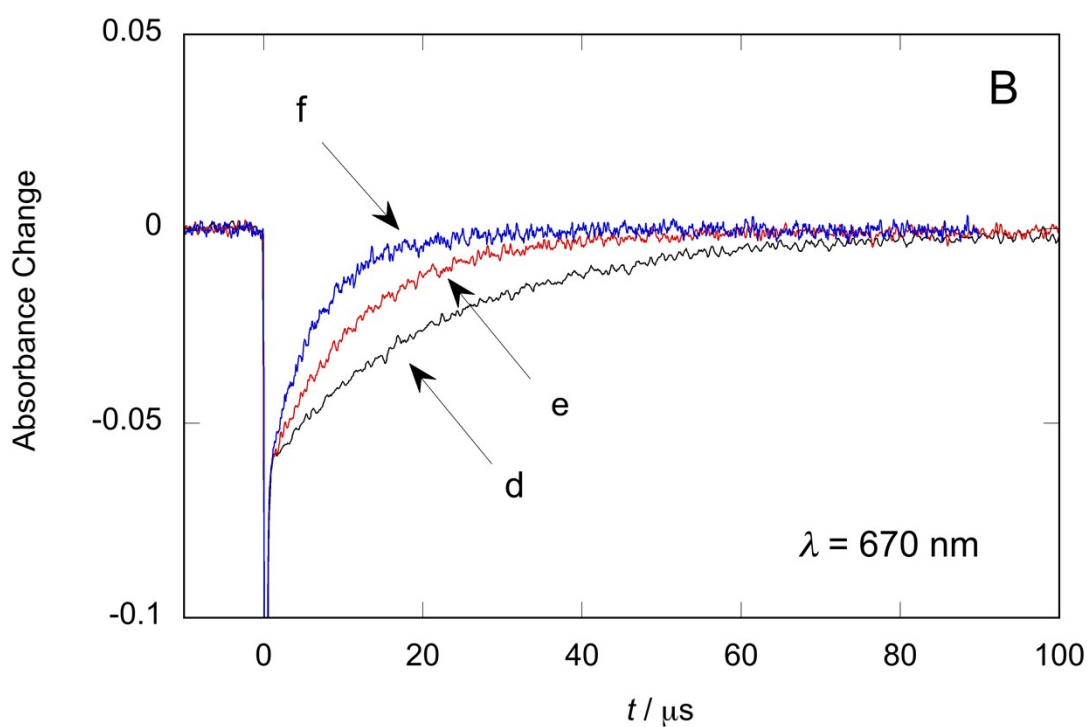

**Figure S11.** Absorbance-time traces for the photoinduced electron transfer reaction (A) and the back electron transfer reaction (B). Conditions: (A)  $[\text{Zn(Pc)}] = 4.48 \times 10^{-6} \text{ M}$ ,  $[\text{VO(salen)}^+] = 5.08 \times 10^{-5} \text{ M}$  (a),  $1.02 \times 10^{-4} \text{ M}$  (b),  $2.03 \times 10^{-4} \text{ M}$  (c); (B)  $[\text{Zn(Pc)}] = 3.39 \times 10^{-6} \text{ M}$ ,  $[\text{VO(salen)}^+] = 2.20 \times 10^{-4} \text{ M}$ ,  $[\text{VO(salen)}] = 5.06 \times 10^{-5} \text{ M}$  (d),  $1.01 \times 10^{-4} \text{ M}$  (e),  $2.03 \times 10^{-4} \text{ M}$  (f).

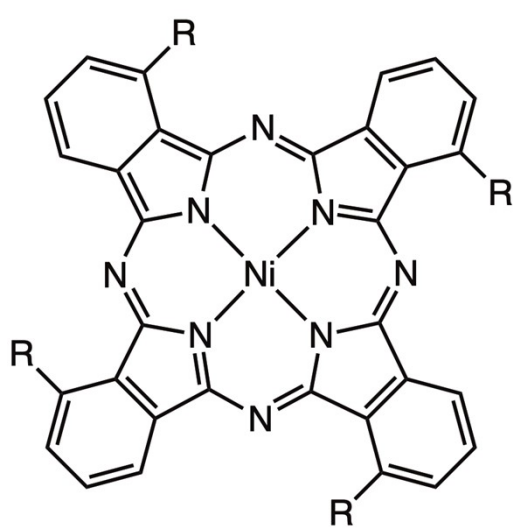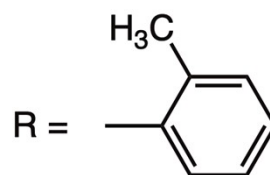

(ref. 32)

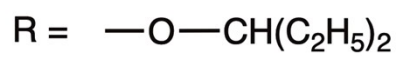

(ref. 63)

**Figure S12.** The molecular structure of the phthalocyanine complexes mentined in the article.

## Preparation of compounds.

**Synthesis of phthalocyanine.** To the mixture of 0.24 g of 3-(2-methoxyphenyl)-phthalonitrile (1.02 mmol) and 5.0 mL of 1-pentanol (Nacalai Tesque) was added 0.053 g of lithium (7.6 mmol), and the mixture was heated to 130 ° C under argon atmosphere for 1 hour. After the reaction mixture was allowed to cool, 6.5 mL of methanol and 1.5 mL of concentrated hydrochloric acid was slowly added with stirring and the mixture was cooled in a refrigerator overnight. The precipitated product was collected by suction filtration, washed with methanol, and then vacuum dried for 1 hour. The obtained solid was purified by silica gel column chromatography eluting with chloroform containing 5% hexane. The main band was collected, and the product was recrystallized from the mixture of chloroform and methanol (3:4) to obtain fine blue-green crystals (0.046 g, 49  $\mu$ mol, 19%).  $^1\text{H}$  NMR (400 MHz,  $\text{CDCl}_3$ ):  $\delta$  / ppm : 8.62 (4H, d,  $J = 7.5$  Hz,  $\text{ArH}$ ), 8.02-8.12 (8H, m,  $\text{ArH}$ ), 7.78-7.92 (8H, m,  $\text{ArH}$ ), 7.36-7.48 (8H, m,  $\text{ArH}$ ), 3.51 (12H, br,  $-\text{OCH}_3$ ),  $-0.53$  (2H, s,  $-\text{NH}$ ).

**Synthesis of the Zn(II) phthalocyanine complex.** 15 mL of the methanol solution containing 0.201 g of zinc(II) acetate (1.15 mmol) was added to the chloroform solution (30 mL) of 0.046 g of the phthalocyanine (49  $\mu$ mol) and the mixture was heated to 75 ° C under argon atmosphere for 5 hours. The solvent was evaporated to dryness. The obtained solid was purified by silica gel column chromatography eluting with dichloromethane containing 2% methanol. The main band was collected, and the product was recrystallized from the mixture of chloroform and methanol (1:2) to obtain fine deep-blue crystals (0.041 g, 41  $\mu$ mol, 84%).  $^1\text{H}$  NMR (400 MHz,  $\text{CDCl}_3$ ):  $\delta$  / ppm : 8.59 (4H, d,  $J = 7.0$  Hz,  $\text{ArH}$ ), 7.93-8.05 (8H, m,  $\text{ArH}$ ), 7.80-7.90 (8H, m,  $\text{ArH}$ ), 7.37-7.43 (8H, m,  $\text{ArH}$ ), 3.44 (12H, br,  $-\text{OCH}_3$ ), 2.56 (6.32H, s,  $\text{CH}_3\text{OH}$ ), 0.21 (2.13H, s,  $\text{CH}_3\text{OH}$ ). Anal. Calcd for  $\text{C}_{60}\text{H}_{40}\text{N}_8\text{O}_4\text{Zn} \cdot 2\text{CH}_3\text{OH} \cdot 1.5\text{H}_2\text{O}$ : C, 68.10; H, 4.70; N, 10.25. Found: C, 68.03; H, 4.46; N, 10.36.

**Synthesis of the Cu(II) phthalocyanine complex.** 7 mL of the methanol solution containing 0.052 g of copper(II) acetate (0.26 mmol) was added to the chloroform solution (20 mL) of 0.022 g of the phthalocyanine (23  $\mu$ mol) and the mixture was heated to 60 ° C under argon atmosphere for 2 hours. The solvent was evaporated to dryness. The obtained solid was purified by silica gel column chromatography eluting with dichloromethane

containing 20% hexane. The main band was collected, and the product was recrystallized from the mixture of chloroform and methanol (1:1) to obtain fine blue-purple crystals (0.020 g, 20  $\mu$ mol, 87%). Anal. Calcd for  $C_{60}H_{40}N_8O_4Cu \cdot H_2O$ : C, 70.75; H, 4.16; N, 11.00. Found: C, 70.92; H, 4.09; N, 11.01.
